# Supplementary material
Source: Springer Nature journal article supplement (https://www.springermedizin.de/resource/supplementary/12967_2012_1107_MOESM2_ESM.pdf/9573718)
Supplement: MOESM2 [file 9573718]

**(a) with gene-centring**

|                    | Hu 306 |               |           |           |                    |              | Total |
|--------------------|--------|---------------|-----------|-----------|--------------------|--------------|-------|
|                    | Basal  | Her2-enriched | Luminal A | Luminal B | Normal breast-like | Unclassified | Total |
| Sørli 500          |        |               |           |           |                    |              |       |
| Basal              | 37     | 0             | 0         | 0         | 0                  | 0            | 37    |
| Her2-enriched      | 4      | 14            | 1         | 0         | 2                  | 0            | 21    |
| Luminal A          | 0      | 1             | 49        | 19        | 0                  | 0            | 69    |
| Luminal B          | 0      | 14            | 1         | 9         | 0                  | 0            | 24    |
| Normal breast-like | 0      | 0             | 5         | 0         | 6                  | 0            | 11    |
| Unclassified       | 0      | 0             | 2         | 4         | 0                  | 1            | 7     |
| Total              | 41     | 29            | 58        | 32        | 8                  | 1            | 169   |

|                    | PAM50 |               |           |           |                    |              | Total |
|--------------------|-------|---------------|-----------|-----------|--------------------|--------------|-------|
|                    | Basal | Her2-enriched | Luminal A | Luminal B | Normal breast-like | Unclassified | Total |
| Sørli 500          |       |               |           |           |                    |              |       |
| Basal              | 37    | 0             | 0         | 0         | 0                  | 0            | 37    |
| Her2-enriched      | 4     | 14            | 2         | 0         | 1                  | 0            | 21    |
| Luminal A          | 0     | 0             | 44        | 25        | 0                  | 0            | 69    |
| Luminal B          | 0     | 15            | 1         | 8         | 0                  | 0            | 24    |
| Normal breast-like | 0     | 0             | 6         | 0         | 5                  | 0            | 11    |
| Unclassified       | 0     | 1             | 3         | 3         | 0                  | 0            | 7     |
| Total              | 41    | 30            | 56        | 36        | 6                  | 0            | 169   |

|                    | PAM50 |               |           |           |                    |              | Total |
|--------------------|-------|---------------|-----------|-----------|--------------------|--------------|-------|
|                    | Basal | Her2-enriched | Luminal A | Luminal B | Normal breast-like | Unclassified | Total |
| Hu 306             |       |               |           |           |                    |              |       |
| Basal              | 39    | 2             | 0         | 0         | 0                  | 0            | 41    |
| Her2-enriched      | 1     | 25            | 1         | 2         | 0                  | 0            | 29    |
| Luminal A          | 0     | 0             | 52        | 6         | 0                  | 0            | 58    |
| Luminal B          | 0     | 3             | 1         | 28        | 0                  | 0            | 32    |
| Normal breast-like | 1     | 0             | 1         | 0         | 6                  | 0            | 8     |
| Unclassified       | 0     | 0             | 1         | 0         | 0                  | 0            | 1     |
| Total              | 41    | 30            | 56        | 36        | 6                  | 0            | 169   |

**(b) with DWD adjustment**

---

|                    | Hu 306 |               |           |           |                    |              | Total |
|--------------------|--------|---------------|-----------|-----------|--------------------|--------------|-------|
|                    | Basal  | Her2-enriched | Luminal A | Luminal B | Normal breast-like | Unclassified | Total |
| Sørrie 500         |        |               |           |           |                    |              |       |
| Basal              | 40     | 4             | 0         | 0         | 0                  | 0            | 44    |
| Her2-enriched      | 1      | 8             | 1         | 0         | 3                  | 0            | 13    |
| Luminal A          | 0      | 0             | 47        | 23        | 0                  | 0            | 70    |
| Luminal B          | 0      | 12            | 0         | 11        | 0                  | 0            | 23    |
| Normal breast-like | 0      | 0             | 9         | 0         | 6                  | 0            | 15    |
| Unclassified       | 0      | 1             | 0         | 1         | 1                  | 1            | 4     |
| Total              | 41     | 25            | 57        | 35        | 10                 | 1            | 169   |

---

---

|                    | PAM50 |               |           |           |                    |              | Total |
|--------------------|-------|---------------|-----------|-----------|--------------------|--------------|-------|
|                    | Basal | Her2-enriched | Luminal A | Luminal B | Normal breast-like | Unclassified | Total |
| Sørrie 500         |       |               |           |           |                    |              |       |
| Basal              | 41    | 3             | 0         | 0         | 0                  | 0            | 44    |
| Her2-enriched      | 0     | 7             | 1         | 1         | 4                  | 0            | 13    |
| Luminal A          | 0     | 1             | 46        | 14        | 9                  | 0            | 70    |
| Luminal B          | 0     | 18            | 1         | 4         | 0                  | 0            | 23    |
| Normal breast-like | 0     | 0             | 2         | 0         | 13                 | 0            | 15    |
| Unclassified       | 0     | 2             | 1         | 0         | 1                  | 0            | 4     |
| Total              | 41    | 31            | 51        | 19        | 27                 | 0            | 169   |

---

---

|                    | PAM50 |               |           |           |                    |              | Total |
|--------------------|-------|---------------|-----------|-----------|--------------------|--------------|-------|
|                    | Basal | Her2-enriched | Luminal A | Luminal B | Normal breast-like | Unclassified | Total |
| Hu 306             |       |               |           |           |                    |              |       |
| Basal              | 40    | 1             | 0         | 0         | 0                  | 0            | 41    |
| Her2-enriched      | 1     | 21            | 1         | 1         | 1                  | 0            | 25    |
| Luminal A          | 0     | 1             | 39        | 1         | 16                 | 0            | 57    |
| Luminal B          | 0     | 8             | 9         | 17        | 1                  | 0            | 35    |
| Normal breast-like | 0     | 0             | 1         | 0         | 9                  | 0            | 10    |
| Unclassified       | 0     | 0             | 1         | 0         | 0                  | 0            | 1     |
| Total              | 41    | 31            | 51        | 19        | 27                 | 0            | 169   |

---
